# Supplementary material for: Heat-sensitive structural phase transitions of hybrid halide perovskite with double dielectric ON/OFF switches
Source: Royal Society of Chemistry journal article supplement (doi:10.1039/c8qi00447a), 2018-01-01
Supplement: c8qi00447a1.pdf [file c8qi00447a1.pdf]

## Supporting Information

### Heat-sensitive structural phase transitions of hybrid halide perovskite with double dielectric ON/OFF switches

Tie Zhang, Cheng Chen, Wan-Ying Zhang, Qiong Ye\*, Da-Wei Fu\*

(Ordered Matter Science Research Center, Jiangsu Key Laboratory for Science and Applications of Molecular Ferroelectrics, Southeast University, Nanjing, 211189, P.R. China)

**Table S1.** Crystal data and structure refinements for **1** at 193 K, 293 K and 323 K

|                                        | 193 K (LTP)                                         | 293 K (RTP)                                         | 323 K (HTP)                                                                                  |
|----------------------------------------|-----------------------------------------------------|-----------------------------------------------------|----------------------------------------------------------------------------------------------|
| Empirical formula                      | C <sub>3</sub> H <sub>10</sub> CdCl <sub>3</sub> NO | C <sub>3</sub> H <sub>10</sub> CdCl <sub>3</sub> NO | C <sub>6</sub> H <sub>20</sub> Cd <sub>2</sub> Cl <sub>6</sub> N <sub>2</sub> O <sub>2</sub> |
| Formula weight                         | 293.86                                              | 294.87                                              | 589.74                                                                                       |
| Temperature(K)                         | 193 (2)                                             | 293 (2)                                             | 323(2)                                                                                       |
| Crystal system                         | Orthorhombic                                        | Orthorhombic                                        | Orthorhombic                                                                                 |
| Space group                            | <i>Pmcn</i>                                         | <i>Pbcm</i>                                         | <i>Pbcm</i>                                                                                  |
| a/ Å                                   | 9.737 (8)                                           | 9.3456 (19)                                         | 9.40 (3)                                                                                     |
| b/ Å                                   | 13.925 (12)                                         | 14.974 (3)                                          | 15.61 (4)                                                                                    |
| c/ Å                                   | 6.765 (6)                                           | 6.7563 (14)                                         | 6.871 (19)                                                                                   |
| Volume/(Å <sup>3</sup> )               | 917.3 (14)                                          | 945.5 (3)                                           | 1008 (5)                                                                                     |
| Z                                      | 4                                                   | 4                                                   | 2                                                                                            |
| Radiation type                         | Mo-K $\alpha$                                       | Mo-K $\alpha$                                       | Mo-K $\alpha$                                                                                |
| Absorption correction                  | Semi-empirical                                      | Semi-empirical                                      | Semi-empirical                                                                               |
| D <sub>calc</sub> / g cm <sup>-3</sup> | 2.128                                               | 2.071                                               | 1.943                                                                                        |
| F(000)                                 | 564                                                 | 568                                                 | 568                                                                                          |
| GOF                                    | 1.350                                               | 1.089                                               | 1.135                                                                                        |
| R <sub>1</sub> [I > 2 $\sigma$ (I)]    | 0.0899                                              | 0.0814                                              | 0.104                                                                                        |
| wR <sub>2</sub> [I > 2 $\sigma$ (I)]   | 0.2589                                              | 0.2365                                              | 0.3238                                                                                       |

**Table S2** Selected bond lengths [ $\text{\AA}$ ] and angles [ $^\circ$ ] for **1** at 193 K, 293 K and 323 K

| Temperature (K)                        |                                         |                           |                                           |                           |             |
|----------------------------------------|-----------------------------------------|---------------------------|-------------------------------------------|---------------------------|-------------|
| <b>193 K</b>                           | Cd1—Cl1                                 | 2.599 (3)                 | Cd1—Cl2                                   | 2.666 (3)                 |             |
|                                        | Cd1—Cl1 <sup>i</sup>                    | 2.616 (3)                 | Cd1—Cl2 <sup>iii</sup>                    | 2.666 (3)                 |             |
|                                        | Cd1—Cl2 <sup>ii</sup>                   | 2.648 (3)                 | Cl1—Cd1 <sup>iv</sup>                     | 2.616 (3)                 |             |
|                                        | Cd1—Cl2 <sup>i</sup>                    | 2.648 (3)                 | Cl2—Cd1 <sup>iv</sup>                     | 2.648 (3)                 |             |
|                                        | Cl1—Cd1—Cl1 <sup>i</sup>                | 179.52 (10)               | Cl2 <sup>ii</sup> —Cd1—Cl2                | 97.41 (11)                |             |
|                                        | Cl1—Cd1—Cl2 <sup>i</sup>                | 96.60 (9)                 | Cl1—Cd1—Cl2 <sup>iii</sup>                | 83.72 (8)                 |             |
|                                        | Cl1 <sup>i</sup> —Cd1—Cl2 <sup>i</sup>  | 83.75 (8)                 | Cl1 <sup>i</sup> —Cd1—Cl2 <sup>iii</sup>  | 95.92 (9)                 |             |
|                                        | Cl1—Cd1—Cl2 <sup>ii</sup>               | 96.60 (9)                 | Cl2 <sup>i</sup> —Cd1—Cl2 <sup>iii</sup>  | 97.41 (11)                |             |
|                                        | Cl1 <sup>i</sup> —Cd1—Cl2 <sup>ii</sup> | 83.75 (8)                 | Cl2 <sup>ii</sup> —Cd1—Cl2 <sup>iii</sup> | 179.50 (3)                |             |
|                                        | Cl2 <sup>i</sup> —Cd1—Cl2 <sup>ii</sup> | 82.93 (12)                | Cl2—Cd1—Cl2 <sup>iii</sup>                | 82.24 (12)                |             |
|                                        | Cl1—Cd1—Cl2                             | 83.72 (8)                 | Cd1—Cl1—Cd1 <sup>iv</sup>                 | 80.87 (10)                |             |
|                                        | Cl1 <sup>i</sup> —Cd1—Cl2               | 95.92 (9)                 | Cd1 <sup>iv</sup> —Cl2—Cd1                | 79.07 (9)                 |             |
|                                        | Cl2 <sup>i</sup> —Cd1—Cl2               | 179.50 (3)                |                                           |                           |             |
|                                        | <b>293 K</b>                            | Cd1—Cl2 <sup>i</sup>      | 2.6371 (17)                               | Cd1—Cl1 <sup>ii</sup>     | 2.6554 (17) |
|                                        |                                         | Cd1—Cl2                   | 2.6371 (17)                               | Cl1—Cd1 <sup>iii</sup>    | 2.6554 (17) |
|                                        |                                         | Cd1—Cl3                   | 2.6437 (17)                               | Cl2—Cd1 <sup>iv</sup>     | 2.6371 (17) |
|                                        |                                         | Cd1—Cl3 <sup>i</sup>      | 2.6437 (17)                               | Cl3—Cd1 <sup>iv</sup>     | 2.6437 (17) |
|                                        |                                         | Cd1—Cl1                   | 2.6554 (17)                               |                           |             |
|                                        |                                         | Cl2 <sup>i</sup> —Cd1—Cl2 | 178.39 (11)                               | Cl3 <sup>i</sup> —Cd1—Cl1 | 83.50 (6)   |
| Cl2 <sup>i</sup> —Cd1—Cl3              |                                         | 95.24 (6)                 | Cl2 <sup>i</sup> —Cd1—Cl1 <sup>ii</sup>   | 97.50 (6)                 |             |
| Cl2—Cd1—Cl3                            |                                         | 83.69 (6)                 | Cl2—Cd1—Cl1 <sup>ii</sup>                 | 83.59 (6)                 |             |
| Cl2 <sup>i</sup> —Cd1—Cl3 <sup>i</sup> |                                         | 83.69 (6)                 | Cl3—Cd1—Cl1 <sup>ii</sup>                 | 83.50 (6)                 |             |
| Cl2—Cd1—Cl3 <sup>i</sup>               |                                         | 95.24 (6)                 | Cl3 <sup>i</sup> —Cd1—Cl1 <sup>ii</sup>   | 177.99 (7)                |             |
| Cl3—Cd1—Cl3 <sup>i</sup>               |                                         | 98.02 (8)                 | Cl1—Cd1—Cl1 <sup>ii</sup>                 | 95.02 (8)                 |             |
| Cl2 <sup>i</sup> —Cd1—Cl1              |                                         | 83.59 (6)                 | Cd1—Cl1—Cd1 <sup>iii</sup>                | 79.00 (6)                 |             |
| Cl2—Cd1—Cl1                            |                                         | 97.50 (6)                 | Cd1—Cl2—Cd1 <sup>iv</sup>                 | 79.66 (6)                 |             |
| Cl3—Cd1—Cl1                            | 177.99 (7)                              | Cd1—Cl3—Cd1 <sup>iv</sup> | 79.42 (6)                                 |                           |             |
| <b>323 K</b>                           | Cd1—Cl3                                 | 2.686 (19)                | Cd1—Cl2                                   | 2.687 (18)                |             |
|                                        | Cd1—Cl3 <sup>i</sup>                    | 2.686 (19)                | Cl1—Cd1 <sup>iii</sup>                    | 2.693 (17)                |             |

|                                        |            |                                        |            |
|----------------------------------------|------------|----------------------------------------|------------|
| Cd1—Cl1                                | 2.693 (17) | Cl2—Cd1 <sup>iii</sup>                 | 2.687 (18) |
| Cd1—Cl1 <sup>i</sup>                   | 2.693 (17) | Cl3—Cd1 <sup>iii</sup>                 | 2.686 (19) |
| Cd1—Cl2 <sup>i</sup>                   | 2.687 (18) |                                        |            |
| Cl3—Cd1—Cl3 <sup>i</sup>               | 178.6 (12) | Cl1 <sup>i</sup> —Cd1—Cl2 <sup>i</sup> | 84.5 (7)   |
| Cl3—Cd1—Cl1                            | 83.6 (6)   | Cl3—Cd1—Cl2                            | 82.5 (7)   |
| Cl3 <sup>i</sup> —Cd1—Cl1              | 97.3 (6)   | Cl3 <sup>i</sup> —Cd1—Cl2              | 96.5 (7)   |
| Cl3—Cd1—Cl1 <sup>i</sup>               | 97.3 (6)   | Cl1—Cd1—Cl2                            | 84.5 (7)   |
| Cl3 <sup>i</sup> —Cd1—Cl1 <sup>i</sup> | 83.6 (6)   | Cl1 <sup>i</sup> —Cd1—Cl2              | 179.9 (4)  |
| Cl1—Cd1—Cl1 <sup>i</sup>               | 95.5 (9)   | Cl2 <sup>i</sup> —Cd1—Cl2              | 95.5 (11)  |
| Cl3—Cd1—Cl2 <sup>i</sup>               | 96.5 (7)   | Cd1—Cl1—Cd1 <sup>iii</sup>             | 79.3 (6)   |
| Cl3 <sup>i</sup> —Cd1—Cl2 <sup>i</sup> | 82.5 (7)   | Cd1 <sup>iii</sup> —Cl2—Cd1            | 79.5 (6)   |
| Cl1—Cd1—Cl2 <sup>i</sup>               | 179.9 (4)  | Cd1—Cl3—Cd1 <sup>iii</sup>             | 79.5 (7)   |

**Symmetry codes:**

193 K (i)  $-x+3/2, -y+1/2, z+1/2$ ; (ii)  $x, -y+1/2, z+1/2$ ; (iii)  $-x+3/2, y, z$ ; (iv)  $-x+3/2, -y+1/2, z-1/2$ .

293 K (i)  $x, -y+3/2, z-1/2$ ; (ii)  $x, -y+3/2, z+1/2$ ; (iii)  $x, y, -z-1/2$ ; (iv)  $x, y, -z+1/2$ .

323 K (i)  $x, -y+1/2, -z$ ; (ii)  $x, y, -z-1/2$ ; (iii)  $x, y, -z+1/2$ ; (iv)  $x, y, -z+3/2$ .

**Table S3** Hydrogen bonds under 293 K for **1**

| D—H $\cdots$ A                  | D—H      | H $\cdots$ A | D $\cdots$ A | D—H $\cdots$ A |
|---------------------------------|----------|--------------|--------------|----------------|
| O1—H3 $\cdots$ Cl1 <sup>v</sup> | 0.89 (2) | 2.52 (3)     | 3.20 (3)     | 133 (4)        |

**Table S4** Hydrogen bonds under 193 K for **1**

| D—H $\cdots$ A                     | D—H  | H $\cdots$ A | D $\cdots$ A | D—H $\cdots$ A |
|------------------------------------|------|--------------|--------------|----------------|
| O1—H1F $\cdots$ O1 <sup>viii</sup> | 0.98 | 2.55         | 3.496 (7)    | 162            |

Symmetry codes: (viii)  $-x+1/2, -y+1/2, z+1/2$ .

**Table S5** The distance of intermolecular O—O for **1** at 193 K, 293 K and 323 K

| Temperature (K)                  | 193 K  | 293 K  | 323 K  |
|----------------------------------|--------|--------|--------|
| Intermolecular O—O distances (Å) | 3.4965 | 3.7904 | 7.9601 |

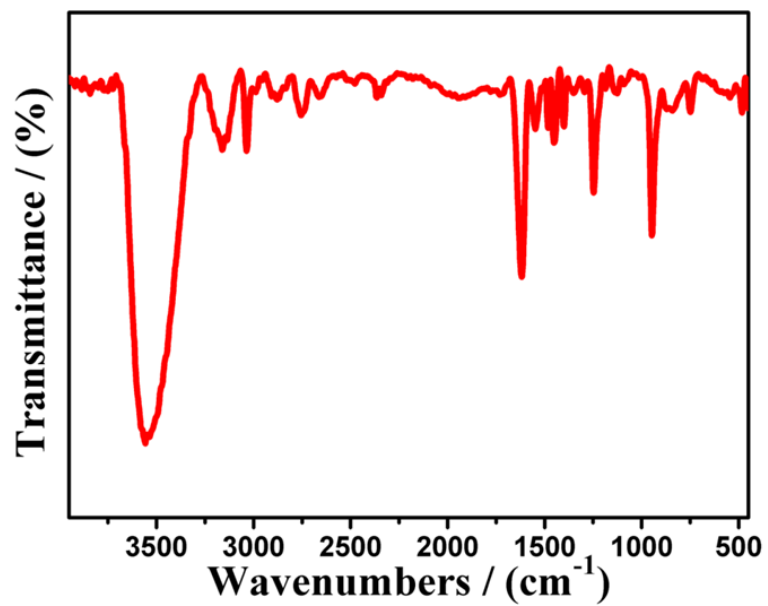

**Fig. S1** The IR spectrum for compound **1**

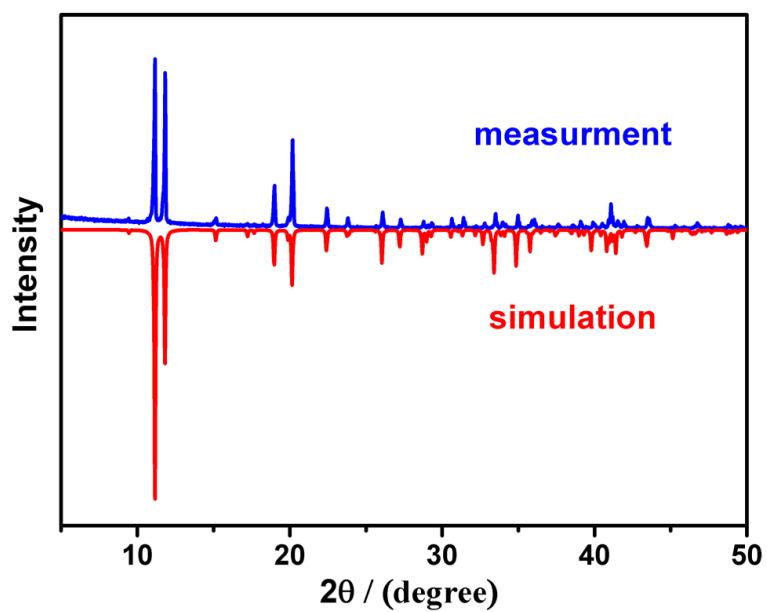

**Fig. S2** The powder X-ray diffraction (PXRD) pattern for compound **1**

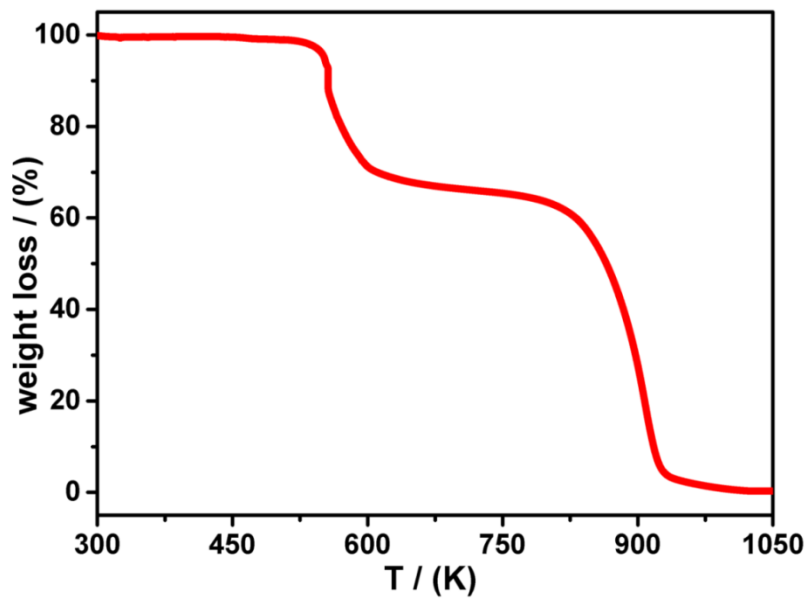

Fig. S3 TGA curves of crystalline sample 1

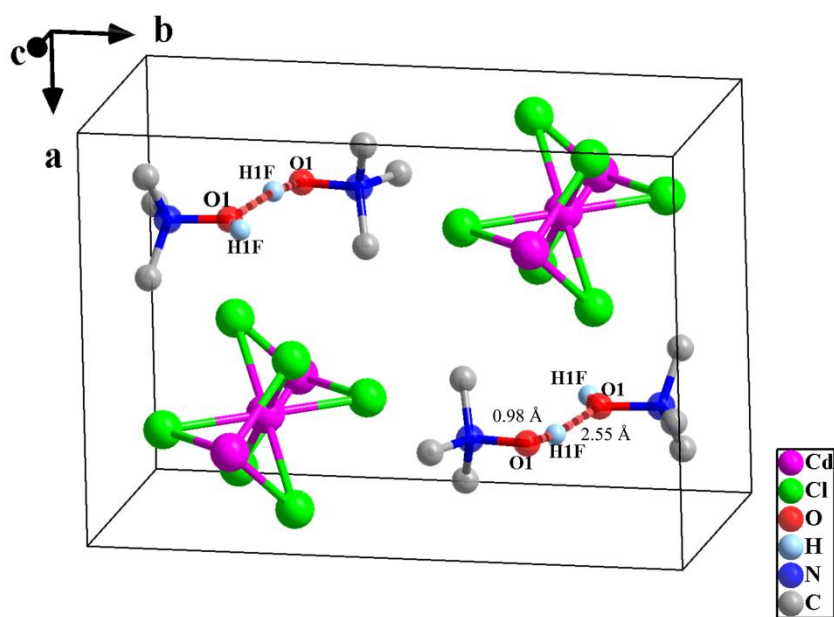

Fig. S4 The crystal structure of 193 K for 1. The orange red dotted line is represented the hydrogen bonding between two organic cations (O1-H1F...O1).

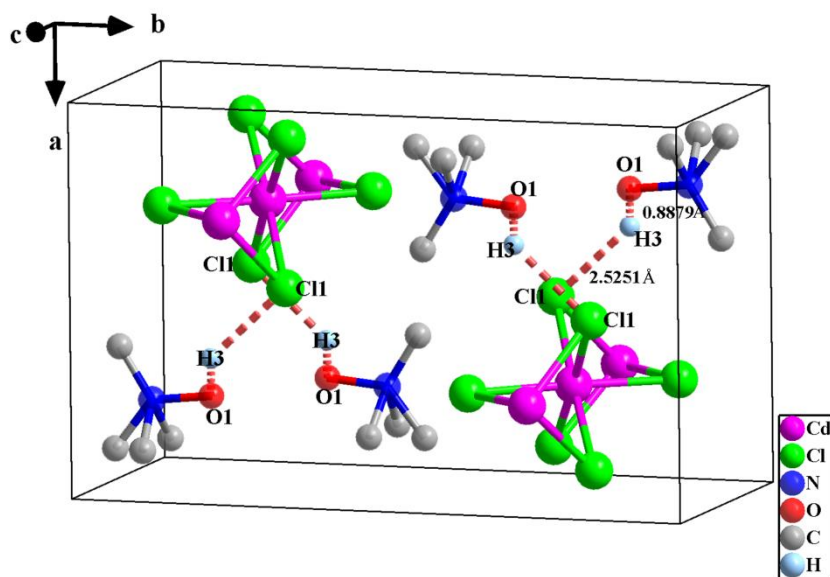

**Fig. S5** The crystal structure of 293 K for **1**. The orange red dotted line is represented the hydrogen bonding between organic cations and inorganic framework (O1-H3  $\cdots$  Cl11).

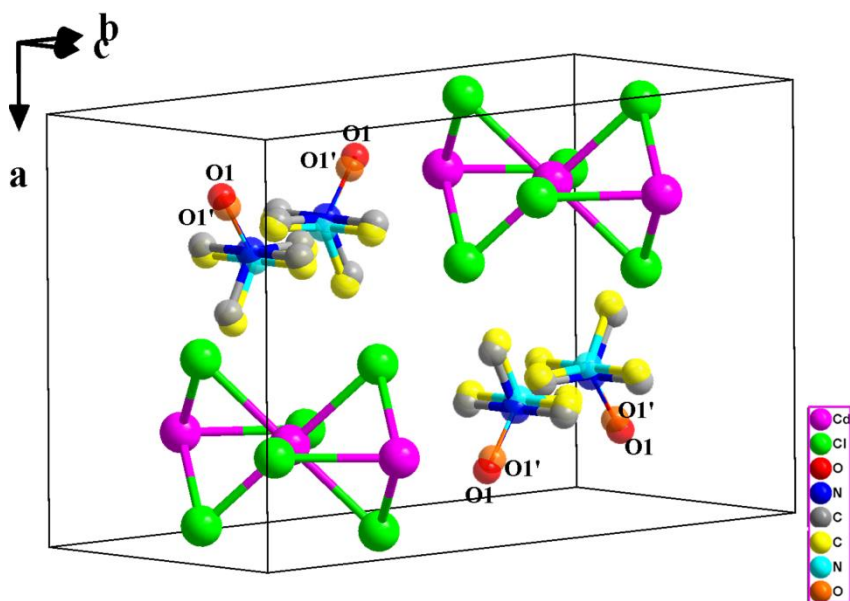

**Fig. S6** The crystal structure of 323 K for **1**. There is no hydrogen bond between the organic cations and inorganic framework/the organic cations. So all H atoms were omitted for clarity.

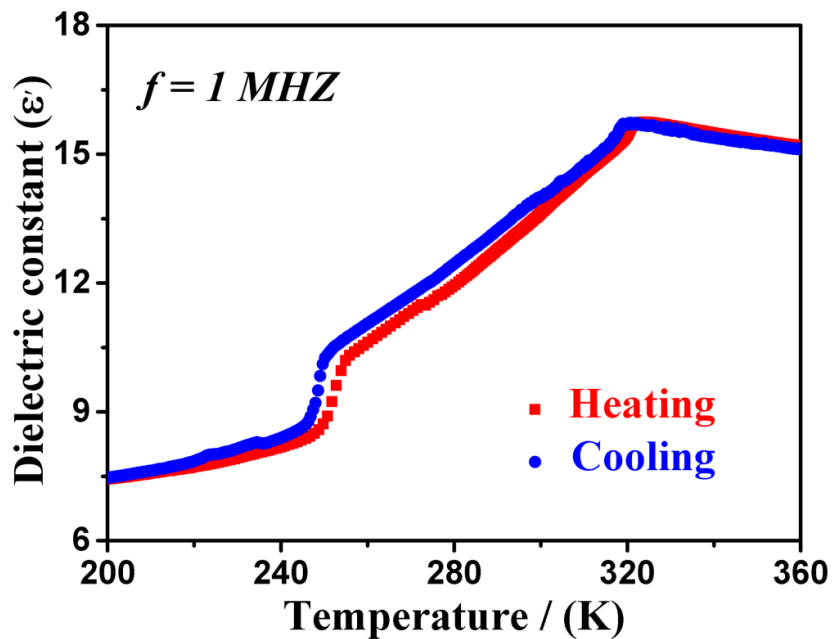

**Fig. S7** The temperature-dependent real part ( $\epsilon'$ ) of the dielectric permittivity of **1** measured on the polycrystalline sample at 1 MHz in heating and cooling.

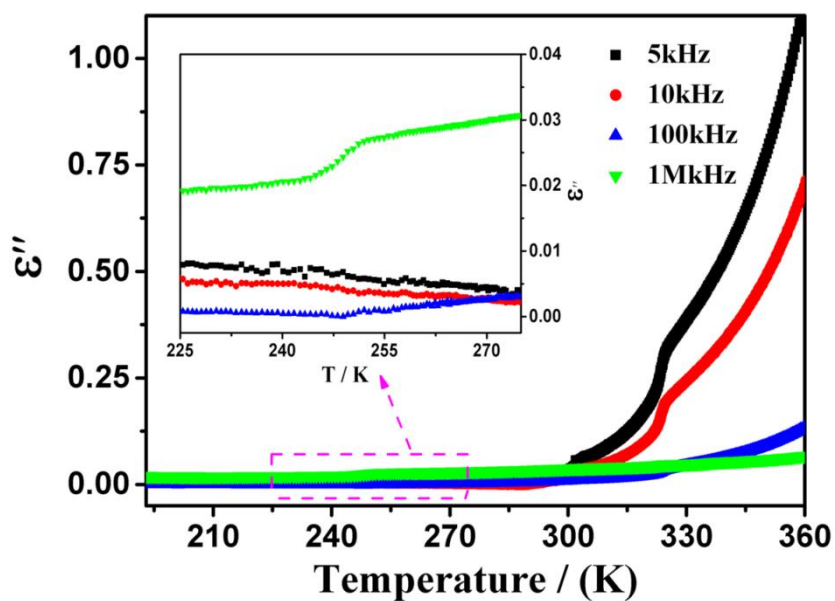

**Fig. S8** Imaginary part of dielectric constant of powder sample **1** measured at selected frequencies 5 kHz to 1 MHz in a heating mode.

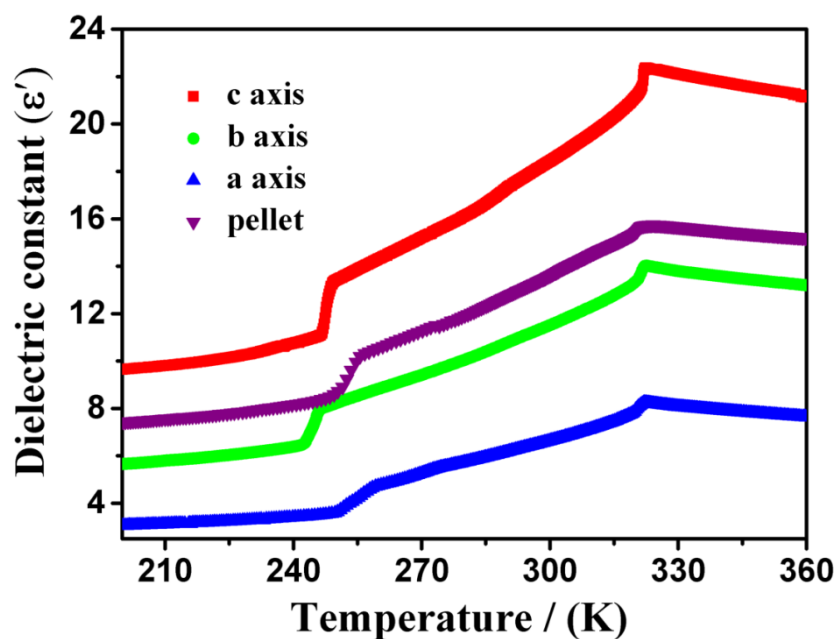

**Fig. S9** The temperature-dependent real part of the complex dielectric constants of the crystal sample **1** along each of the different crystallographic directions of a-axis, b-axis, c-axis and polycrystalline at 1 MHz.

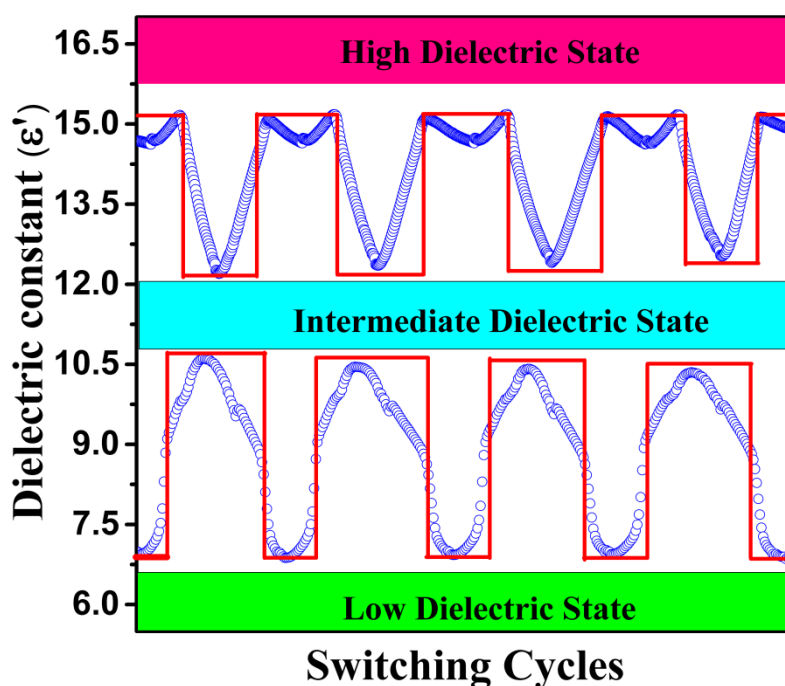

**Fig. S10** The recoverable switching of dielectric effects of pressed-powder pellet for **1**. Of which, the blue line represents the actual measured dielectric constant with time gone, and the red line represents their fitting curves.



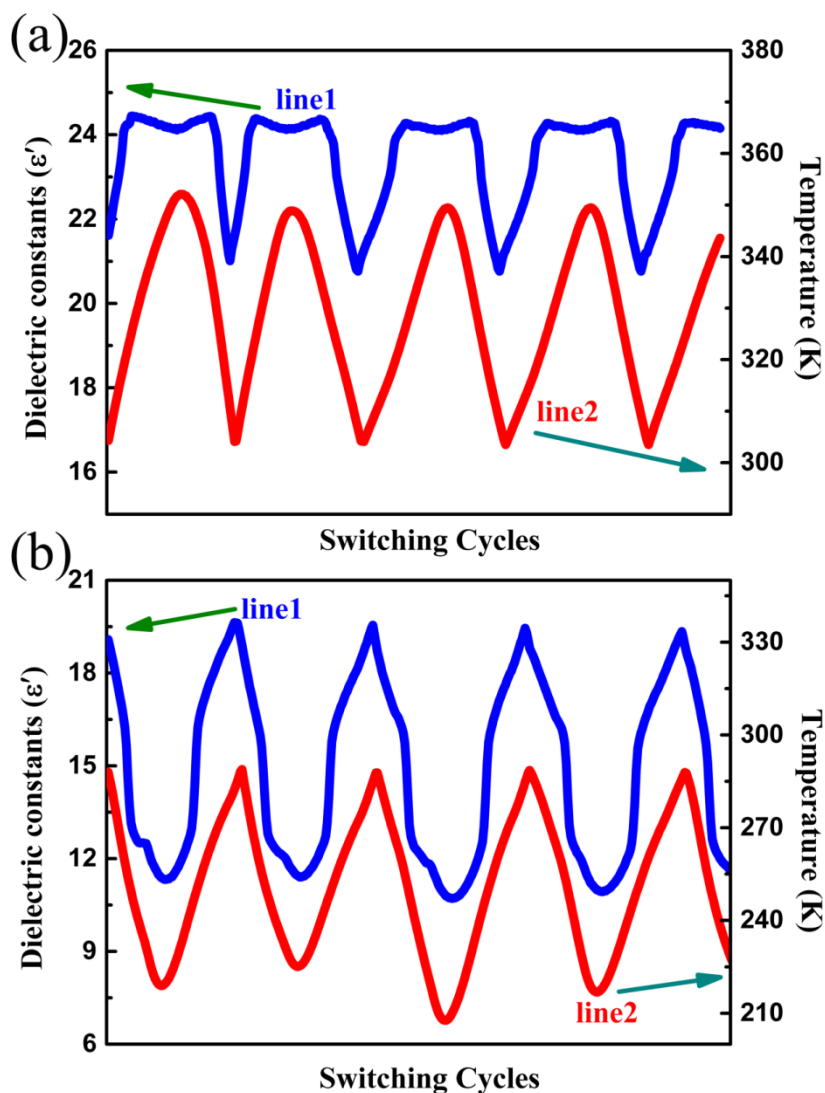

**Fig. S11** (a) The recoverable switching of dielectric effects of single-crystal along the c-axis for **1** above room temperature (blue line 1). And the corresponding temperature curve is red line 2, indicating the relationship of dielectric switching curves and temperature profiles over time is matched the switches. (b) The recoverable switching of dielectric effects of single-crystal along the c-axis for **1** below room temperature (blue line 1). And the corresponding temperature curve is red line 2, indicating the relationship of dielectric switching curves and temperature curves over time is matched the switches.

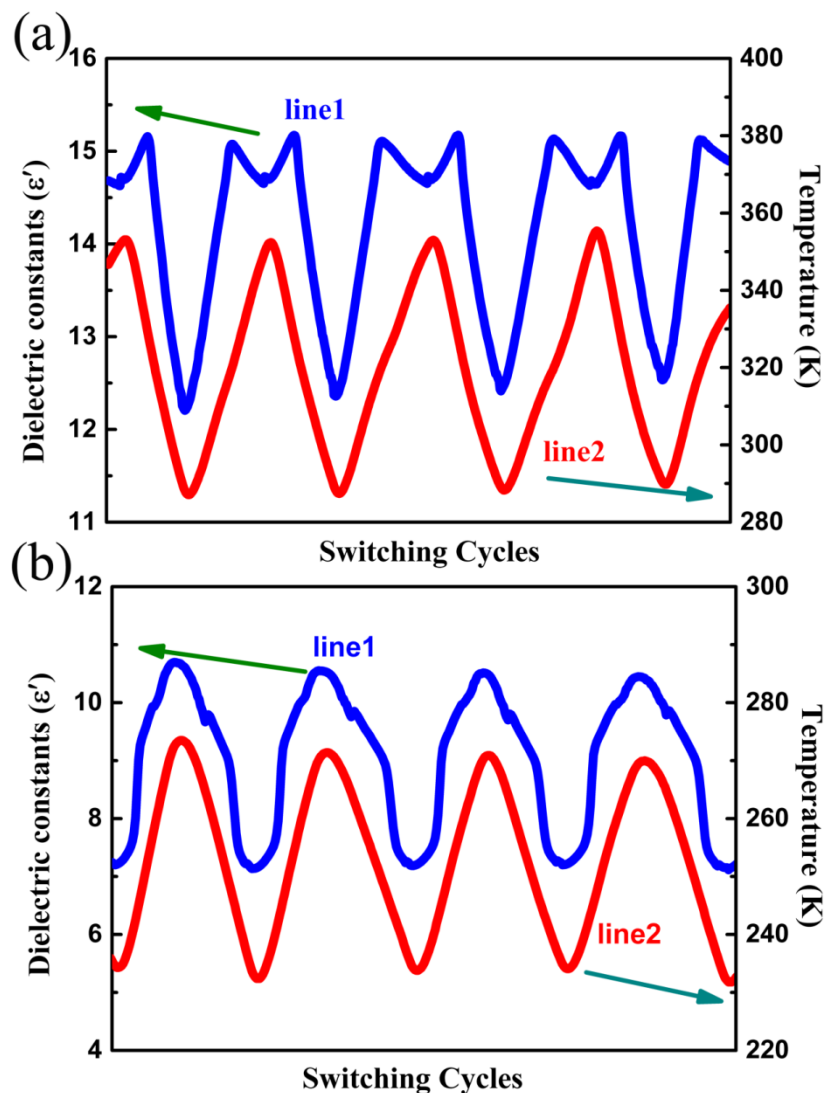

**Fig. S12** (a) The recoverable switching of dielectric effects of pressed-powder pellet for **1** above room temperature (blue line 1). And the corresponding temperature curve is red line 2, indicating the relationship of dielectric switching curves and temperature curves over time is matched the switches. (b) The recoverable switching of dielectric effects of pressed-powder pellet for **1** below room temperature (blue line 1). And the corresponding temperature curve is red line 2, indicating the relationship of dielectric switching curves and temperature profiles over time is matched the switches.
